# Supplementary material for: Suffruticosol B Is an Osteogenic Inducer through Osteoblast Differentiation, Autophagy, Adhesion, and Migration
Source: MDPI journal article supplement (doi:10.3390/ijms232113559), 2022-11-04
Supplement: s1 [file s1]

**A**

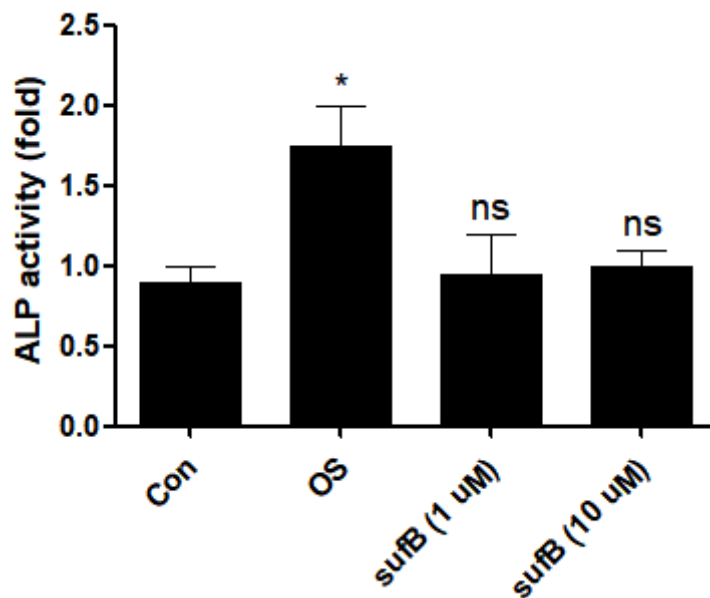

**Supplementary Figure S1.** Effects of Suf-B alone on osteoblast. (A) Suf-B was treated for 7 days in pre-osteoblasts, and osteoblast differentiation was detected by ALP activity. \*,  $p < 0.05$ : compared with the control (Con).
